# Supplementary material
Source: HighWire-hosted journal article supplement (https://gut.bmj.com/content/70/2/342)

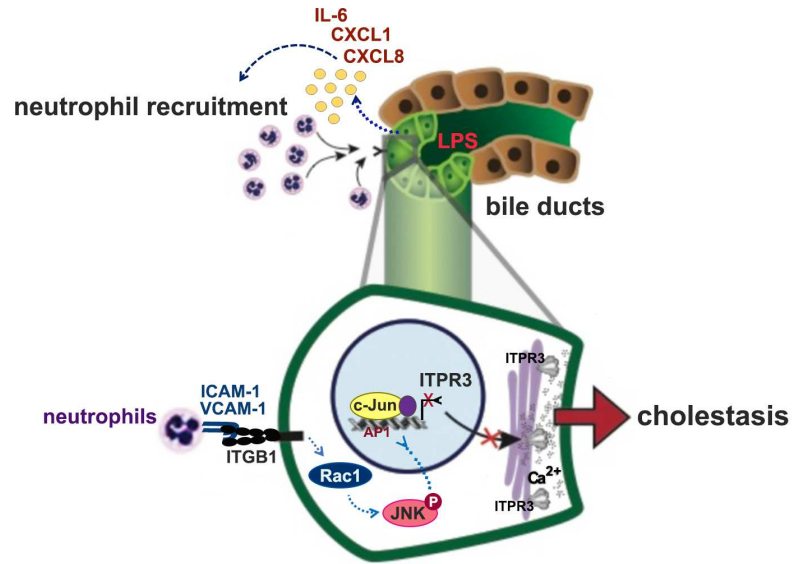Takeuchi M. *et al.* Graphic Abstract

Supplement: inline-supplementary-material-13 [file inline-supplementary-material-13.pdf]

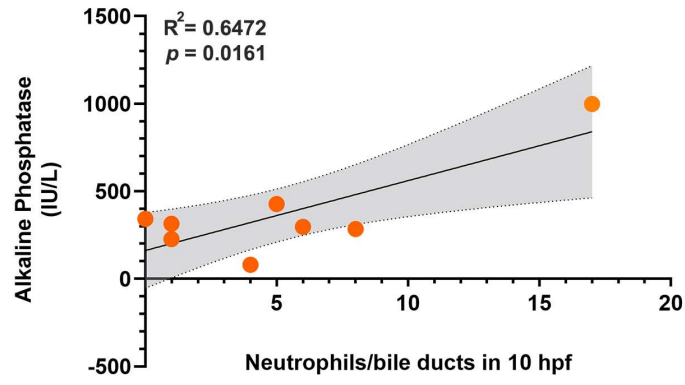

Takeuchi M. *et al.* Suppl. Fig. S2

Supplement: inline-supplementary-material-4 [file inline-supplementary-material-4.pdf]

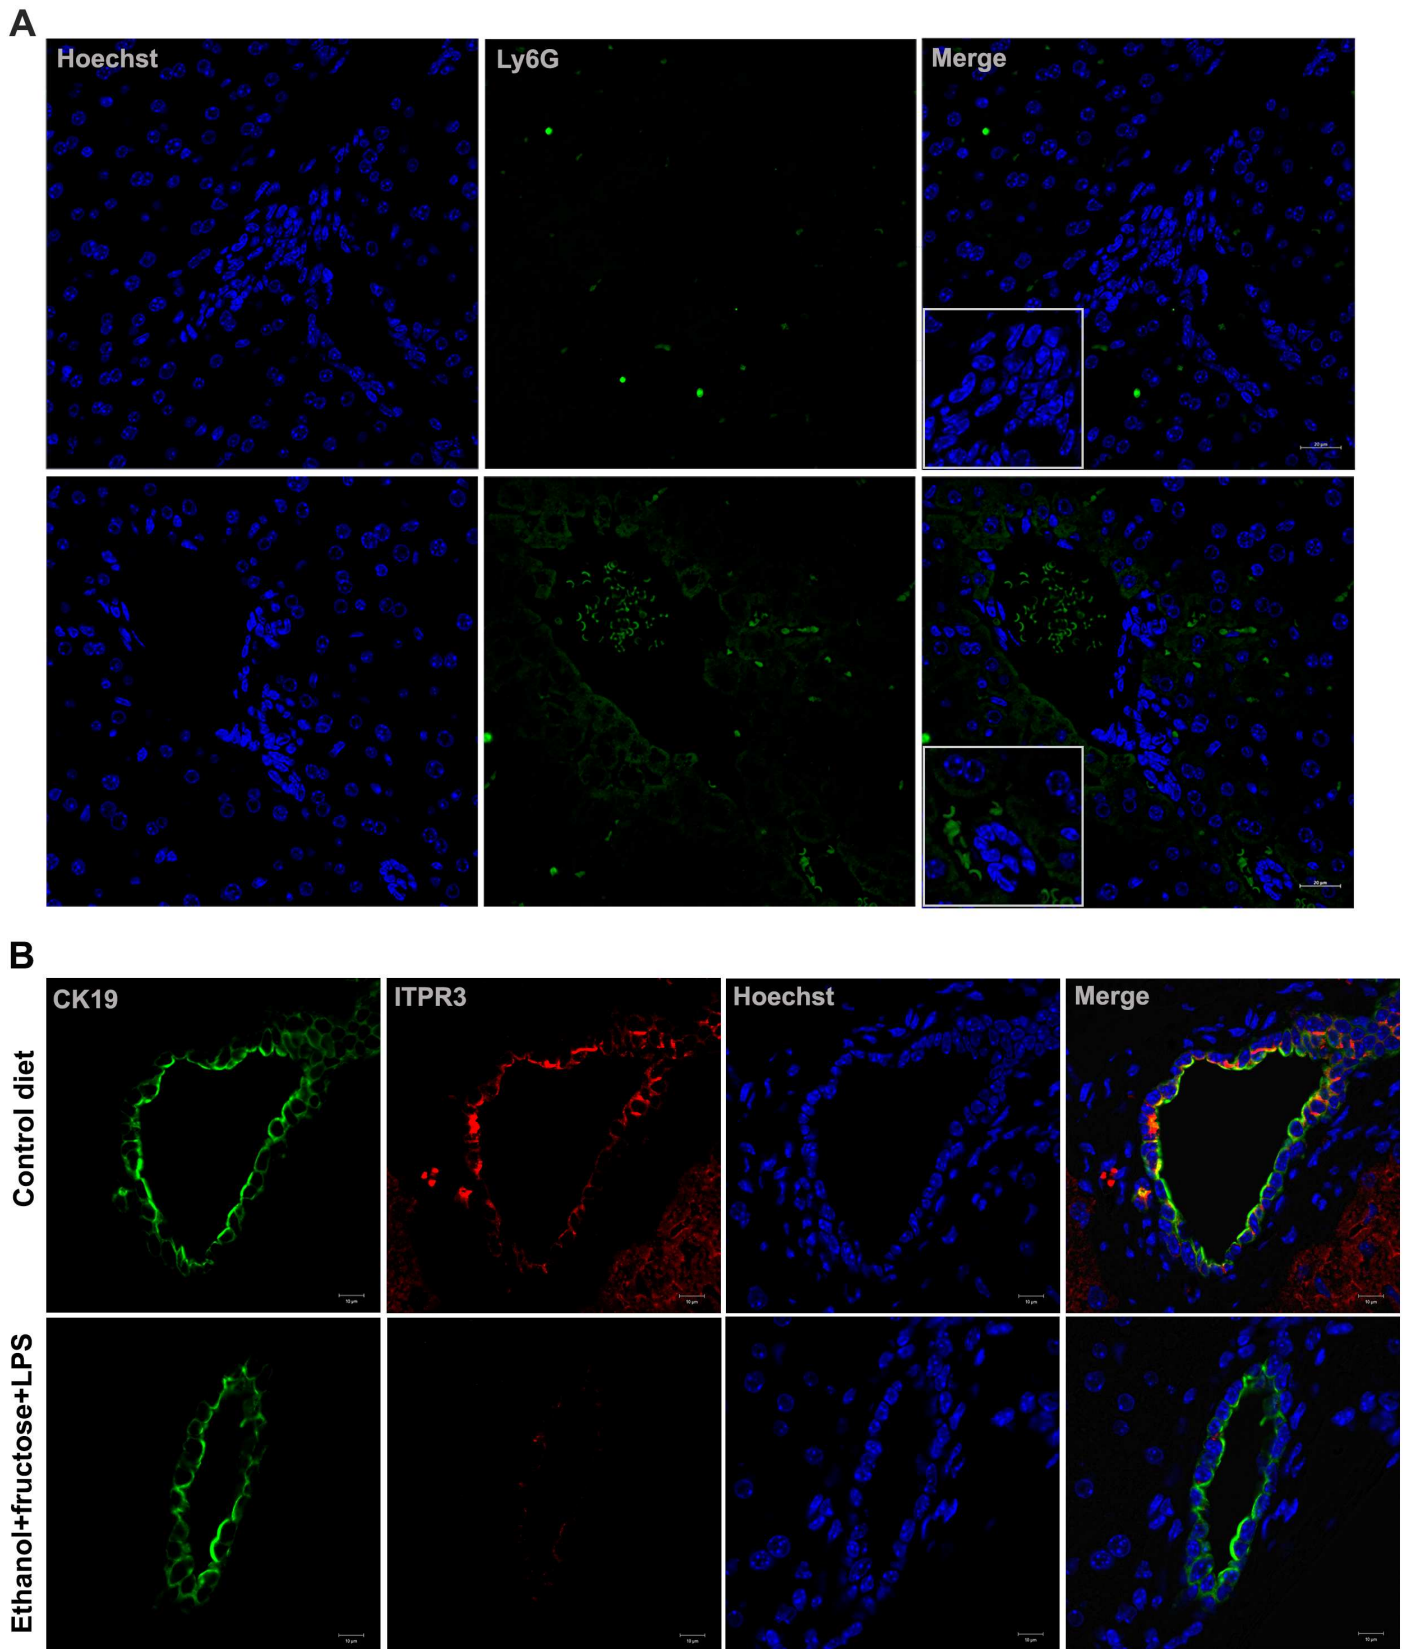Takeuchi M. *et al.* Suppl. Fig. S4

Supplement: inline-supplementary-material-6 [file inline-supplementary-material-6.pdf]
